# Supplementary material for: Generic prognostic factors for musculoskeletal pain in primary care: a systematic review
Source: PubMed Central journal article supplement — BMJ Open. 2017 Jan 17;7(1):e012901. doi: 10.1136/bmjopen-2016-012901 (PMC5253570; doi:10.1136/bmjopen-2016-012901), 2017-01-17
Supplement: bmjopen-2016-012901supp_appendix1.pdf [file bmjopen-2016-012901supp_appendix1.pdf]

## Appendix 1: Search strategies for musculoskeletal, primary care, prognosis studies

### EMBASE\_28062012 (OVID)

1. exp joint/
2. joint\$1.ti,ab.
3. exp spine/
4. spine\$1.ti,ab.
5. spinal.ti,ab.
6. lumbar.ti,ab.
7. cervical.ti,ab.
8. back.ti,ab.
9. neck.ti,ab.
10. shoulder\$1.ti,ab.
11. exp limb/
12. exp arm/
13. arm\$1.ti,ab.
14. hand\$1.ti,ab.
15. wrist\$1.ti,ab.
16. knee\$1.ti,ab.
17. hip\$1.ti,ab.
18. 1 or 2 or 3 or 4 or 5 or 6 or 7 or 8 or 9 or 10 or 11 or 13 or 14 or 15 or 16 or 17
19. (pain\$ or ache\$1 or aching).ti,ab.
20. 18 and 19
21. exp arthropathy/
22. arthralgi\$.ti,ab.
23. polyarthralgi\$.ti,ab.
24. exp Pain/
25. fibromyalgi\$.mp.
26. fibrosit\$.mp.
27. 20 or 21 or 22 or 23 or 24 or 25 or 26
28. exp Primary Health Care/
29. exp general practice/
30. exp general practitioner/
31. "general practi\$".mp.
32. (primary adj2 care\$).mp.
33. "family practi\$".mp.
34. "family physician\$".mp.
35. "family doctor\$".mp.
36. GP.mp.
37. 28 or 29 or 30 or 31 or 32 or 33 or 34 or 35 or 36
38. Prognosis/
39. prognos\$3.ti,ab.
40. cohort.mp.
41. predict.mp.
42. death.mp.
43. exp Models, Statistical/
44. exp Epidemiologic Studies/
45. mortality.mp.
46. course.mp.
47. 38 or 39 or 40 or 41 or 42 or 43 or 44 or 45 or 46
48. 27 and 37 and 47

## Medline\_27062012 (OVID)

1. exp Joints/
2. joint\$1.ti,ab.
3. spine\$1.ti,ab.
4. spinal.ti,ab.
5. lumbar.ti,ab.
6. cervical.ti,ab.
7. back.ti,ab.
8. neck.ti,ab.
9. shoulder\$1.ti,ab.
10. exp Upper Extremity/
11. arm\$1.ti,ab.
12. hand\$1.ti,ab.
13. wrist\$1.ti,ab.
14. exp Lower Extremity/
15. knee\$1.ti,ab.
16. hip\$1.ti,ab.
17. 1 or 2 or 3 or 4 or 5 or 6 or 7 or 8 or 9 or 10 or 11 or 12 or 13 or 14 or 15 or 16
18. (pain\$ or ache\$1).ti,ab.
19. 17 and 18
20. exp Joint Diseases/
21. arthralgi\$.ti,ab.
22. polyarthralgi\$.ti,ab.
23. exp Pain/
24. fibromyalgi\$.mp.
25. fibrosit\$.mp.
26. 19 or 20 or 21 or 22 or 23 or 24 or 25
27. exp Primary Health Care/
28. exp Family Practice/
29. exp Physicians, Family/
30. "general practi\$".mp.
31. (primary adj2 care\$).mp.
32. "family practi\$".mp.
33. "family physician\$".mp.
34. "family doctor\$".mp.
35. GP.mp.
36. 27 or 28 or 29 or 30 or 31 or 32 or 33 or 34 or 35
37. Prognosis/
38. prognos\$3.ti,ab.
39. cohort.mp.
40. predict.mp.
41. death.mp.
42. exp Models, Statistical/
43. exp Epidemiologic Studies/
44. mortality.mp.
45. mo.fs.
46. course.mp.
47. 37 or 38 or 39 or 40 or 41 or 42 or 43 or 44 or 45 or 46
48. 26 and 36 and 47

## PsycInfo\_28062012 (OVID)

1. exp "joints (anatomy)"/
2. joint\$1.ti,ab.
3. exp Spinal Column/
4. spine\$1.ti,ab.
5. spinal.ti,ab.
6. lumbar.ti,ab.
7. cervical.ti,ab.
8. back.ti,ab.
9. neck.ti,ab.
10. shoulder\$1.ti,ab.
11. "arm (anatomy)"/
12. arm\$1.ti,ab.
13. hand\$1.ti,ab.
14. wrist\$1.ti,ab.
15. knee\$1.ti,ab.
16. hip\$1.ti,ab.
17. 1 or 2 or 3 or 4 or 5 or 6 or 7 or 8 or 9 or 10 or 11 or 12 or 13 or 14 or 15 or 16
18. (pain\$ or ache\$1 or aching).ti,ab.
19. 17 and 18
20. exp joint disorders/
21. arthralgi\$.ti,ab.
22. polyarthralgi\$.ti,ab.
23. exp Pain/
24. fibromyalgi\$.mp.
25. fibrosit\$.mp.
26. 19 or 20 or 21 or 22 or 23 or 24 or 25
27. exp Primary Health Care/
28. exp Family Physicians/ or exp Family Medicine/
29. exp General Practitioners/
30. "general practi\$".mp.
31. (primary adj2 care\$).mp.
32. "family practi\$".mp.
33. "family physician\$".mp.
34. "family doctor\$".mp.
35. GP.mp.
36. 27 or 28 or 29 or 30 or 31 or 32 or 33 or 34 or 35
37. Prognosis/
38. prognos\$3.ti,ab.
39. cohort.mp.
40. predict.mp.
41. death.mp.
42. exp mathematical modeling/
43. exp Epidemiology/
44. mortality.mp.
45. exp Mortality Rate/
46. course.mp.
47. 37 or 38 or 39 or 40 or 41 or 42 or 43 or 44 or 45 or 46
48. 26 and 36 and 47

**CINAHL\_28062012 (HDAS)**

exp JOINTS/

joint\*1.ti,ab

exp SPINE/

((spine OR spinal)).ti,ab

lumbar.ti,ab

cervical.ti,ab

back.ti,ab

neck.ti,ab

shoulder\*1.ti,ab

exp UPPER EXTREMITY/

arm\*1.ti,ab

hand\*1.ti,ab

wrist\*1.ti,ab

knee\*1.ti,ab

hip\*1.ti,ab

exp LOWER EXTREMITY/

1 OR 2 OR 3 OR 4 OR 5 OR 6 OR 7 OR 8 OR 9 OR 10 OR 11 OR 12 OR 13 OR 14 OR 15 OR 16

(pain\* OR ache\*1 OR aching).ti,ab

17 AND 18

exp JOINT DISEASES/

arthralgi\*.ti,ab

polyarthralgi\*.ti,ab

exp PAIN/

fibromyalgi\*.ti,ab

fibrosit\*.ti,ab

19 OR 20 OR 21 OR 22 OR 23 OR 24 OR 25

exp PROGNOSIS/

prognos\*3.ti,ab

cohort.ti,ab,de

predict\*.ti,ab

exp DEATH/

death.ti,ab

exp MODELS, STATISTICAL/

exp EPIDEMIOLOGY/

mortality.ti,ab,de

course.ti,ab

27 OR 28 OR 30 OR 31 OR 32 OR 33 OR 34 OR 35 OR 37 OR 38

exp PRIMARY HEALTH CARE/

exp FAMILY PRACTICE/

exp PHYSICIANS, FAMILY/

"general practi\*".ti,ab

(primary adj2 care).ti,ab

"family practi\*".ti,ab

"family physician\*".ti,ab

"family doctor\*".ti,ab

GP.ti,ab

40 OR 41 OR 42 OR 43 OR 44 OR 45 OR 46 OR 47 OR 48

26 AND 39 AND 49
