# Supplementary material for: Generic prognostic factors for musculoskeletal pain in primary care: a systematic review
Source: PubMed Central journal article supplement — BMJ Open. 2017 Jan 17;7(1):e012901. doi: 10.1136/bmjopen-2016-012901 (PMC5253570; doi:10.1136/bmjopen-2016-012901), 2017-01-17
Supplement: bmjopen-2016-012901supp_appendix2.pdf [file bmjopen-2016-012901supp_appendix2.pdf]

## Appendix 2: Characteristics of included studies (Citations Appendix 4)

| ID      | Author, publication year  | Country         | Sample size  | Length of follow up, months | Attrition rate | Participant characteristics, age, mean years               | Participant characteristics, gender (Female %) | Pain site     | Primary outcome measures                                                                  |
|---------|---------------------------|-----------------|--------------|-----------------------------|----------------|------------------------------------------------------------|------------------------------------------------|---------------|-------------------------------------------------------------------------------------------|
| 1       | Dillane 1966              | UK              | 470          | 48                          | 28             | N/R                                                        | 48                                             | Back          | Duration of index attack measured by time between first and last consultation, recurrence |
| 2       | Pedersen 1981             | Denmark         | 78           | 12                          | 92             | N/R                                                        | 51                                             | Back          | Symptoms , work absence, analgesia use                                                    |
| 3, (4)  | Roland 1983               | UK              | 230 episodes | 1                           | 21             | 46                                                         | 53                                             | Back          | RMDQ, pain rating scale, sickness absence , recurrence of pain                            |
| 5       | Chavannes 1986            | The Netherlands | 475          | 1                           | 4              | N/R                                                        | N/R                                            | Back          | Pain persistence, localisation of pain                                                    |
| 6       | Lanier 1988               | USA             | 116          | 2                           | 14             | 38                                                         | 39                                             | Back          | Days off work, functional disability (RMDQ)                                               |
| 7       | Potter 1992               | UK              | 45           | 6                           | 6              | 50                                                         | 69                                             | General MSK   | Chronic pain                                                                              |
| 8       | Von Korff, 1993           | USA             | 1128         | 12                          | 28             | 18-24 (5%),<br>25-44 (46%),<br>45-64 (35%),<br>65-74 (15%) | 53                                             | Back          | Characteristic back pain severity                                                         |
| 9       | Coste 1994                | France          | 103          | 7days                       | 11             | 47                                                         | 40                                             | Back          | Complete recovery from pain, return to work                                               |
| 10 (30) | Burton 1995               | UK              | 252          | 12                          | 26             | 42                                                         | 48                                             | Back          | RMDQ                                                                                      |
| 11      | Klenerman 1995            | UK              | 300          | 12                          | 35             | N/R                                                        | 50                                             | Back          | RMDQ, present pain                                                                        |
| 12      | Croft 1996                | UK              | 166          | 8                           | 25             | N/R                                                        | N/R                                            | Shoulder/Neck | Disability (validated questionnaire) (6 and 18 months)                                    |
| 13      | Engel 1996                | USA             | 1059         | 12                          | N/R            | 18-44 (48%)<br>45-64 (36%)<br>65-74 (16%)                  | 53                                             | Back          | Health care utilisation and costs                                                         |
| 14      | van der Windt 1996        | The Netherlands | 349          | 12                          | 4              | 50                                                         | 56                                             | Shoulder/Neck | Persistent symptoms                                                                       |
| 15      | Dionne 1997               | Canada          | 1213         | 24                          | 8              | 47                                                         | 54                                             | Back          | RMDQ                                                                                      |
| 16      | van den Hoogen 1997       | The Netherlands | 605          | 12                          | 27             | 43                                                         | 52                                             | Back          | Duration of pain                                                                          |
| 17      | Linton 1998               | Sweden          | 142          | 6                           | 3              | 48                                                         | 65                                             | Back          | Accumulated sick leave                                                                    |
| 18      | Macfarlane 1999           | UK              | 246          | 18                          | 33             | N/R                                                        | 69                                             | Back          | Symptom status                                                                            |
| 19      | Reis 1999                 | Israel          | 219          | 2                           | 8              | 46                                                         | 51                                             | Back          | Persistent pain                                                                           |
| 20      | Schiottz-Christensen 1998 | Denmark         | 503          | 12                          | 4              | 38                                                         | 38                                             | Back          | Sick leave, functional recovery                                                           |
| 21      | Thomas 1999               | UK              | 180          | 18                          | 27             | N/R                                                        | 59                                             | Back          | Persistent disabling low back pain                                                        |
| 22      | Carey 2000                | USA             | 1246         | 22                          | 24             | 43                                                         | 54                                             | Back          | Functional recovery                                                                       |
| 23      | Jorgensen 2000            | Denmark         | 905          | 3                           | 17             | 56                                                         | 70                                             | General MSK   | Physical health, sick leave, medication use, self-rated improvement                       |

|    |                      |                 |                                   |                                                  |     |                                           |      |               |                                                                                                 |
|----|----------------------|-----------------|-----------------------------------|--------------------------------------------------|-----|-------------------------------------------|------|---------------|-------------------------------------------------------------------------------------------------|
| 24 | Werneke 2001         | USA             | 223                               | 12                                               | 16  | 38                                        | 48   | Back          | Maximal pain intensity, work status, sick leave, activity interference, health care utilisation |
| 25 | Gureje 2001          | Multinational   | 3197                              | 12                                               | N/R | 46                                        | 62   | General MSK   | Persistent pain                                                                                 |
| 26 | Atroshi 2002         | Sweden          | 189                               | 3                                                | 4   | 44                                        | 61   | General MSK   | Long term sick leave                                                                            |
| 27 | Sieben 2002          | The Netherlands | 44                                | 12                                               | 32  | 52                                        | 50   | Back          | RMDQ, pain related fear (TSK), pain catastrophizing (PCS)                                       |
| 28 | Birrell 2003         | UK              | 195                               | 48                                               | N/R | 63                                        | 68   | Hip           | Hip replacement listing                                                                         |
| 29 | Enthoven 2003        | Sweden          | 44                                | 12                                               | 20  | 46                                        | 66   | Back          | Pain (VAS), back related disability ODI                                                         |
| 31 | Coste 2004           | France          | 113                               | 3                                                | 2   | 44                                        | 51   | Back          | RMDQ, VAS pain                                                                                  |
| 32 | Dunn 2004            | UK              | 556                               | 12                                               | 28  | 42                                        | 52   | Back          | RMDQ                                                                                            |
| 33 | Leboeuf-Yde 2004     | Norway          | 875                               | 12                                               | 41  | 48                                        | 53   | Back          | Pain free patients                                                                              |
| 34 | Leroux 2004          | Canada          | 849                               | 12                                               | N/R | 58                                        | 52   | Back          | Functional limitation, RMDQ                                                                     |
| 35 | Bot 2005             | The Netherlands | 443                               | 12                                               | N/R | 42                                        | 63   | Shoulder/Neck | Patient perceived recovery, pain intensity, functional disability                               |
| 36 | Bot 2005             | The Netherlands | 181                               | 12                                               | 12  | 56                                        | 66   | Elbow         | Patient perceived recovery, change in pain and physical function                                |
| 37 | Dionne 2005          | Canada          | 1007                              | 24                                               | 14  | 52                                        | 42   | Back          | Return to work in good health                                                                   |
| 38 | Grotle 2004          | Norway          | 123                               | 3                                                | 2   | 39                                        | 57   | Back          | Pain intensity, RMDQ, sickness absence                                                          |
| 39 | Kovacs 2005          | Spain           | 366                               | 2                                                | N/R | 52                                        | 54   | Back          | Quality of Life, disability                                                                     |
| 40 | Lievensse 2005       | The Netherlands | 164                               | 60                                               | N/R | 58                                        | 80   | Hip           | Persistent pain                                                                                 |
| 41 | Sieben 2005          | The Netherlands | 222                               | 12                                               | 22  | 25-34 (18%)<br>35-44 (25%)<br>45-54 (39%) | 43   | Back          | Chronic Pain Grade                                                                              |
| 42 | Van der Waal 2005    | The Netherlands | 251                               | 12                                               | 19  | 68                                        | 68   | Knee          | Patient perceived recovery, change in pain and physical function                                |
| 43 | Koleck 2006          | France          | 99                                | 12                                               | N/R | 56                                        | 51   | Back          | Chronic pain                                                                                    |
| 44 | Kuijpers 2006        | The Netherlands | 587                               | 6                                                | 8   | 48                                        | 50   | Shoulder/Neck | Persistent symptoms                                                                             |
| 45 | Swinkels-Meewis 2006 | The Netherlands | 431                               | 6                                                | N/R | 62                                        | 42   | Back          | RMDQ and participation                                                                          |
| 46 | Paans 2001           | Netherlands     | 391                               | Variation due to censoring, Maximum was 10 years | N/R | 67                                        | 71.1 | Hip           | Diagnostic code - Outcome - HIP OA                                                              |
| 47 | Paloneva 2013        | Finland         | 128                               | 12                                               | 19  | 54                                        | 67   | Shoulder      | American Shoulder and Elbow Surgeons Standardised Shoulder Assessment Form and VAS              |
| 48 | Ryall 2007           | UK              | 375 but only 313 used in analysis | 12                                               | 17  | 15-44 (32%)<br>45-54 (35%)<br>55-64 (33%) | 59   | Arm           | Southampton Examination Schedule for Upper Limb Disorders. Outcome is same site pain            |
| 49 | Scheele 2013         | Netherlands     | 626                               | 3                                                | 7   | 66                                        | 59   | Back          | Self-perceived recovery, NRS pain severity, RDQ disability, medication use                      |

|    |                  |                 |      |    |     |                                         |                                                      |                        |                                                                                                                                                                                                                                                                                                                                                                                                         |
|----|------------------|-----------------|------|----|-----|-----------------------------------------|------------------------------------------------------|------------------------|---------------------------------------------------------------------------------------------------------------------------------------------------------------------------------------------------------------------------------------------------------------------------------------------------------------------------------------------------------------------------------------------------------|
| 50 | Vos, 2008        | Netherlands     | 138  | 12 | 26  | 38 (Female),<br>43 (Male)               | 63                                                   | Neck                   | Self-perceived recovery, total days sick leave.                                                                                                                                                                                                                                                                                                                                                         |
| 51 | Grotle, 2007     | Norway          | 112  | 12 | 9   | 38                                      | 55                                                   | Back                   | NRS pain intensity, RMDQ disability, sickness absence to indicate recovery                                                                                                                                                                                                                                                                                                                              |
| 52 | Grotle, 2010     | UK              | 939  | 12 | 55  | 46                                      | 59                                                   | Back                   | RMDQ disability                                                                                                                                                                                                                                                                                                                                                                                         |
| 53 | Hancock, 2009    | Australia       | 239  | 3  | 1   | 41                                      | 44                                                   | Back                   | Recovery as indicated by score of 1 or below on NRS of pain intensity                                                                                                                                                                                                                                                                                                                                   |
| 54 | Hasenbring, 2012 | Germany         | 145  | 6  | 18  | 45                                      | 51                                                   | Back                   | Pain intensity and disability                                                                                                                                                                                                                                                                                                                                                                           |
| 55 | Heneweer, 2007   | Netherlands     | 56   | 3  | 15  | 41                                      | 36 (in recovered group), 44 (in non-recovered group) | Back                   | VAS pain intensity and Quebec disability scale                                                                                                                                                                                                                                                                                                                                                          |
| 56 | Henschke 2008    | Australia       | 973  | 12 | 29  | 43                                      | 45                                                   | Back                   | Age, gender, pain intensity, and interference with function: psychological characteristics were mostly associated with time to recovery: coping mechanism, anxiety, feeling depressed, risk of persistence.                                                                                                                                                                                             |
| 57 | Henschke 2012    | The Netherlands | 1123 | 12 | 7   | 48                                      | 60                                                   | Non-spinal             | Pain site                                                                                                                                                                                                                                                                                                                                                                                               |
| 58 | Hermesen 2014    | The Netherlands | 407  | 18 | 8   | 75                                      | 70                                                   | Joint pain             | Over-optimism                                                                                                                                                                                                                                                                                                                                                                                           |
| 59 | Hider 2015       | UK              | 3019 | 12 | 30  | 43                                      | 54                                                   | Back                   | Age, gender, pain duration.                                                                                                                                                                                                                                                                                                                                                                             |
| 60 | Hiebert 2012     | USA             | 253  | 3  | N/R | 32                                      | 64                                                   | Back                   | Clinical, demographic and psychological covariates.                                                                                                                                                                                                                                                                                                                                                     |
| 61 | Jellema 2006     | The Netherlands | 305  | 6  | N/R | 42                                      | 80                                                   | Back                   | GP practice, to adjust for clustering.                                                                                                                                                                                                                                                                                                                                                                  |
| 62 | Jensen 2013      | Denmark         | 4325 | 18 | 24  | 47                                      | 56                                                   | Back, Upper extremity  | Gender                                                                                                                                                                                                                                                                                                                                                                                                  |
| 63 | Belo 2009        | The Netherlands | 549  | 12 | 69  | 54                                      | 49                                                   | Knee                   | Incident non-traumatic knee symptoms                                                                                                                                                                                                                                                                                                                                                                    |
| 64 | Blagojevic 2008  | UK              | 2592 | 36 | 23  | 50-64 (52%)<br>65-74 (31%)<br>75+ (16%) | 59                                                   | Knee                   | Propensity to consult                                                                                                                                                                                                                                                                                                                                                                                   |
| 65 | Campbell 2013    | UK              | 1591 | 60 | 30  | 47                                      | 62                                                   | Back                   | All covariates were adjusted to each other in each domain. Demographic (age, gender, education status, social class) physical (functional disability (RMDQ) pain intensity (0-10 NRS), symptoms duration, presence of leg pain and upper body pain) psychological (illness perception Q, Tampa scale, coping strategies Q, behavioural coping, pain self-efficacy Q, HADS), Occupational (work status). |
| 66 | Chenot 2006      | Germany         | 1345 | 12 | 9   | 48                                      | 58                                                   | Back                   | Physical function, the Hanover Functional Ability Questionnaire (HFAQ), subjective mood and utilization of health care services.                                                                                                                                                                                                                                                                        |
| 67 | Dionne 2007      | Canada          | 1007 | 24 | 16  | 39                                      | 42                                                   | Back                   | Return to work in good health (RWGH)                                                                                                                                                                                                                                                                                                                                                                    |
| 68 | Dunn 2011        | UK              | 776  | 12 | 50  | 47                                      | 54                                                   | Back                   | Age, gender, education, dissatisfaction with work, previous history of LBP, long LBP duration, high functional disability, leg pain, bothersomeness, anxiety, depression, fear avoidance, poor self-related health.                                                                                                                                                                                     |
| 69 | Feleus 2007      | The Netherlands | 682  | 6  | 10  | 45                                      | 78                                                   | Arm, neck and shoulder | Multiple regression analysis including all covariates: patients characteristics, complaint characteristics, psychosocial, physical activity, work characteristics,                                                                                                                                                                                                                                      |
| 70 | Foster 2010      | UK              | 3019 | 6  | 40  | 44                                      | 59                                                   | Back                   | Illness perception, fear avoidance beliefs, coping, anxiety and depression, self-efficacy beliefs.                                                                                                                                                                                                                                                                                                      |
| 71 | Cecchi 2011      | Italy           | 178  | 12 | 9   | 65                                      | 75                                                   | Neck                   | Demographics, weight, height, patients education, working and family status, practice of physical activity, self-perceived health, life satisfaction, mood (on SF - 36), recent and past history of neck pain, persistent or recurrent.                                                                                                                                                                 |

|    |                |                 |      |    |    |    |     |                 |                                                               |
|----|----------------|-----------------|------|----|----|----|-----|-----------------|---------------------------------------------------------------|
| 72 | Eggermont 2014 | USA             | 765  | 18 | 14 | 78 | 64  | Widespread pain | Boston Pain Questionnaire and Mobility, ADL and IADL measures |
| 73 | Elfering 2014  | New Zealand     | 315  | 2  | 30 | 36 | 65  | Back            | McGill Pain Questionnaire and Zung depression                 |
| 74 | Nordeman 2014  | Sweden          | 130  | 24 | 5  | 45 | 100 | Back            | Work ability                                                  |
| 75 | Laslett 2015   | New Zealand     | 161  | 12 | 16 | 42 | 49  | Shoulder        | Shoulder pain and disability index (SPADI)                    |
| 76 | Kongsted 2013  | Denmark         | 1169 | 3  | 22 | 45 | 50  | Back            | Pain intensity, global improvement                            |
| 77 | Viniol 2015    | Germany         | 647  | 12 | 12 | 56 | 58  | Back            | Incidence of widespread pain                                  |
| 78 | Hermsen 2014   | The Netherlands | 407  | 18 | 22 | 77 | 66  | Any MSK pain    | Physical functioning (RAND-36)                                |

*N/R: Not reported.*
