# Supplementary material for: Generic prognostic factors for musculoskeletal pain in primary care: a systematic review
Source: PubMed Central journal article supplement — BMJ Open. 2017 Jan 17;7(1):e012901. doi: 10.1136/bmjopen-2016-012901 (PMC5253570; doi:10.1136/bmjopen-2016-012901), 2017-01-17
Supplement: bmjopen-2016-012901supp_appendix3.pdf [file bmjopen-2016-012901supp_appendix3.pdf]

### Appendix 3: Citations of studies included in the systematic review.

1. Dillane JB, Fry J, Lalton G. Acute back syndrome – a study from general practice. *BMJ* 1966; 2: 82-84.
2. Pedersen P. Prognostic indicators in low back pain. *J R Coll Gen Pract* 1981; 31: 209-216.
3. Roland M, Morrell D, Morris R. Can general practitioners predict the outcome of episodes of back pain? *BMJ* 1983; 286: 523-526.
4. Roland M, Morris R. A study of the natural history of low-back pain. Part II: Development of guidelines for trials of treatment in primary care. *Spine* 1983; 8: 145-150.
5. Chavannes A, Gubbels J, Post D, Rutten G, Thomas S. Acute low back pain: patients' perceptions of pain four weeks after initial diagnosis and treatment in general practice. *J R Coll Gen Pract* 1986; 36: 271-273.
6. Lanier D, Stockton P. Clinical predictors of outcome of acute episodes of low back pain. *J Fam Pract* 1988; 27: 483-489.
7. Potter R, Jones J. The evolution of chronic pain among patients with musculoskeletal problems: a pilot study in primary care. *Br J Gen Pract* 1992; 42: 462-464.
8. Von Korff M, Deyo R, Cherkin D, Barlow W. Back pain in primary care: outcomes at one year. *Spine* 1993; 18: 855-862.
9. Coste J, Delecoeuillerie G, Cohen de Lara A, LeParc J, Paolaggi J. Clinical course and prognostic factors in acute low back pain: an inception cohort study in primary care practice. *BMJ* 1994; 308: 577-580.
10. Burton K, Tillotson M, Main C, Hollis C. Psychosocial predictors of outcome in acute and sub-chronic low back trouble. *Spine* 1995; 20: 722-728.
11. Klenerman L, Slade P, Stanley I, Pennie B, Reilly J, Atchison L, Troup J, Rose M. The prediction of chronicity in patients with an acute attack of low back pain in a general practice setting. *Spine* 1995; 20: 478-484.
12. Croft P, Pope D, Silman A. The clinical course of shoulder pain: prospective cohort study in primary care. *BMJ* 1996; 313: 601-602.
13. Engel C, Von Korff M, Katon W. Back pain in primary care: predictors of high health care costs. *Pain* 1996; 65: 197-204.
14. Van der Windt D, Koes B, Boeke A, Deville W, de Jong B, Bouter L. Shoulder disorders in general practice: prognostic indicators of outcome. *Br J Gen Pract* 1996; 46: 519-523.
15. Dionne C, Koepsell T, Von Korff M, Deyo R, Barlow W, Checkoway H. Predicting long-term functional limitations among back pain patients in primary care settings. *J Clin Epidemiol* 1997; 50: 31-43.
16. Van den Hoogen H, Koes B, Deville W, van Eijk J, Bouter H. The prognosis of low back pain in general practice. *Spine* 1997; 22: 1515-1521.
17. Linton S, Hallden K. Can we screen for problematic back pain? A screening questionnaire for predicting outcome in acute and subacute back pain. *Clin J Pain* 1998; 14: 209-215.
18. Macfarlane G, Thomas E, Croft P, Papageorgiou A, Jayson M, Silman A. Predictors of early improvement in low back pain amongst consulters to general practice: the influence of pre-morbid and episode related factors. *Pain* 1999; 80: 113-119.
19. Reis S, Hermoni D, Borkan JM, Biderman A, Tabenkin C, Porat A. A new look at low back complaints in primary care: a RAMBAM Israeli Family Practice Research Network study. *J Fam Pract* 1999; 48: 299-303.
20. Schiottz-Christensen B, Nielsen G, Hansen V, Schodt T, Sorensen H, Olesen F. Long term prognosis of acute low back pain in patients seen in general practice: a 1-year prospective follow up study. *Fam Pract* 1999; 16: 223-232.
21. Thomas E, Silman A, Croft P, Papageorgiou A, Jayson M, Macfarlane G. Predicting who develops chronic low back pain in primary care: a prospective study. *BMJ* 1999; 19: 1662-1667.
22. Carey TS, Garrett JM, Jackman AM. Beyond the good prognosis. Examination of an inception cohort of patients with chronic low back pain. *Spine* 2000; 25: 115-120.
23. Jorgensen C, Fink P, Olsen F. Psychological distress and somatisation as prognostic factors in patients with musculoskeletal illness in general practice. *Br J Gen Pract* 2000; 50: 537-541.

24. Werneke M, Hart DL. Centralization phenomenon as a prognostic factor for chronic low back pain and disability. *Spine* 2001; 26: 758-764.
25. Gureje O, Simon G, Von Korff M. A cross-national study of the course of persistent pain in primary care. *Pain* 2001; 92: 195-200.
26. Atroshi I, Andersson I, Gummesson C, Leden I, Odenbring S, Ornstein E. Primary care patients with musculoskeletal pain. *Scand J Rheumatol* 2002; 31: 239-244.
27. Sieben JM, Vlaeyen JW, Tuerlinckx S, Portegijs PJ. Pain-related fear in acute low back pain: the first two weeks of a new episode. *Eur J Pain* 2002; 6: 229-237.
28. Birrell F, Afzal C, Nahit E, Lunt M, Macfarlane G, Cooper C, Croft P, Hosie G, Silman A. Predictors of hip joint replacement in new attenders in primary care with hip pain. *Br J Gen Pract* 2003; 53: 26-30.
29. Enthoven P, Skargren EI, Kjellman G, Öberg BE. Course of back pain in primary care. A prospective study of physical measures. *J Rehabil Med* 2003; 35: 168-173.
30. Burton AK, McClune TD, Clarke RD, Main CJ. Long-term follow-up of patients with low back pain attending for manipulative care-outcomes and predictors. *Man Ther* 2004; 9: 30-35.
31. Coste J, Lefrancois G, Guillemin F, Pouchot J. Prognosis and quality of life in patients with acute low back pain: insights from a comprehensive inception cohort study. *Arthritis Rheum* 2004; 51: 168-176.
32. Dunn KM. Epidemiology of low back pain in primary care: a cohort study of consulters. Keele University; 2004.
33. Leboeuf-Yde C, Gronstvedt A, Borge JA, Lothe J, Magnesen E, Nilsson Ø, Rosok G, Stig LC, Larsen K. The Nordic Back Pain Subpopulation Program: Demographic and Clinical Predictors for Outcome in Patients Receiving Chiropractic Treatment for Persistent Low-Back Pain. *J Manipulative Physiol Ther* 2004; 27: 493-502.
34. Leroux I, Dionne C, Bourbonnais R. Psychosocial job factors and one year evolution of back-related functional limitations. *Scand J Work Environ Health* 2004; 30: 47-55.
35. Bot SDM, Terwee JM, van der Windt DAWM, Scholten RJPM, Bouter LM, Dekker J. Predictors of Outcome in Neck and Shoulder Symptoms: A Cohort Study in General Practice. *Spine* 2005;30: E459-E470
36. Bot SDM, van der Waal JM, Terwee CB, van der Windt DAWM, Bouter LM, Dekker J. Course and prognosis of elbow complaints: a cohort study in general practice. *Ann Rheum Dis* 2005;64:1331-1336.
37. Dionne CE, Bourbonnais R, Frémont P, Rossignol M, Stock SR, Larocque I. A clinical return-to-work rule for patients with back pain. *CMAJ* 2005; 172 (12): 1559-1567.
38. Grotle M, Brox JI, Veierød MB, Vøllestad NK. Clinical course and prognostic factors in acute low back pain: patients seeking help for their first time. *Spine* 2005; 30: 976-982.
39. Kovacs FM, Abreira V, Zamora J, Carmen Fernandez C and the Spanish Back Pain Research Network. The transition from acute to subacute and chronic low back pain: a study based on determinants of quality of life and prediction of chronic disability. *Spine* 2005;30: 1786-1792.
40. Lievense AM. Determinants on the cause and course of hip pain in the elderly in primary care. 2005 Publication: <http://hdl.handle.net/1765/7041>
41. Sieben JM, Vlaeyen JWS, Portegijs PJM, Verbunt JA, van Riet-Rutgers S, Kester ADM, von Korff M, Arntz A, Knottnerus JA. A longitudinal study on the predictive validity of the fear-avoidance model in low back pain. *Pain* 2005;117:162-170.
42. van der Waal JM, Bot SDM, Terwee CB, van der Windt DAWM, Scholten RJPM, Bouter LM, Dekker J. Course and Prognosis of Knee Complaints in General Practice. *Arthritis & Rheumatism* 2005;53:920-930.
43. Koleck M, Mazaux JM, Rasclé N, Bruchon-Schweitzer M. Psycho-social factors and coping strategies as predictors of chronic evolution and quality of life in patients with low back pain: A prospective study. *European Journal of Pain* 2006;10: 1-11.
44. Kuijpers T, van der Windt D, van der Heijden G and Bouter L. Systematic review of prognostic cohort studies on shoulder disorders. *Pain* 2004; 109:420-431.

45. Swinkels-Meewisse IEJ, Roelofs J, Verbeek ALM, Oostendorp RAB, Vlaeyen JWS. Fear-avoidance beliefs, disability, and participation in workers and non-workers with acute low back pain. *Clin J Pain* 2006;22:45–54.
46. Paans N, van der Veen WJ, van der Meer K, Bulstra SK, van den Akker-Scheek I, Stevens M. Time spent in primary care for hip osteoarthritis patients once the diagnosis is set: a prospective observational study. *BMC Family Practice* 2011, 12:48.
47. Paloneva J, Koskela S, Kautiainen H, Vanhala M, Kiviranta I. Consumption of medical resources and outcome of shoulder disorders in primary health care consulters. *BMC Musculoskeletal Disorders* 2013; 14:348.
48. Ryall C, Coggon D, Peveler R, Poole J, Palmer KT. A prospective cohort study of arm pain in primary care and physiotherapy-prognostic determinants. *Rheumatology* 2007;46:508–515.
49. Scheele J, Enthoven WTM, Sita M.A, Bierma-Zeinstra SMA, Peul WC, van Tulder MW, Bohnen AM, Berger MY, Koes BW, Luijsterburg PAJ. Course and prognosis of older back pain patients in general practice: A prospective cohort study. *Pain* 2013; 154: 951–957.
50. Vos CJ, Verhagen AP, Passchier J, Koes BW. Clinical course and prognostic factors in acute neck pain: an inception cohort study in general practice. *Pain Medicine* 2008; 9:572-580.
51. Grotle M, Brox JI, Glomsrød B, Lønn JH, Vøllestad NK. Prognostic factors in first-time care seekers due to acute low back pain. *EJP* 2007; 11: 290–298.
52. Grotle M, Nadine E, Foster NE, Dunn KM, Croft PR. Are prognostic indicators for poor outcome different for acute and chronic low back pain consulters in primary care? *Pain* 2010;151: 790–797.
53. Hancock MJ, Maher CG, Latimer J, Herbert RD, McAuley JH. Can rate of recovery be predicted in patients with acute low back pain? Development of a clinical prediction rule. *EJP* 2009;13: 51–55.
54. Hasenbring MI, Hallner D, Klasen B, Streitlein-Böhme I, Willburger R, Rusche H. Pain-related avoidance versus endurance in primary care patients with subacute back pain: Psychological characteristics and outcome at a 6-month follow-up. *Pain* 2012; 153: 211–217.
55. Heneweer H, Aufdemkampe G, van Tulder MW, Kiers H, Stappaerts KH, Vanhees L. Psychosocial variables in patients with (sub) acute low back pain: an inception cohort in primary care physical therapy in the Netherlands. *Spine* 2007;32: 586–592.
56. Henschke N, Maher CG, Refshauge KM, Herbert RD, Cumming RG, Bleasel J, York J, Das A, McAuley JH. Prognosis in patients with recent onset low back pain in Australian primary care: inception cohort study. *BMJ* 2008;337:a171 doi:10.1136/bmj.a171.
57. Henschke N, Ostello RWJG, Terwee CB, Van der Windt DAWM. Identifying generic predictors of outcome in patients presenting to primary care with non-spinal musculoskeletal pain. *Arthritis Care & Research* 2012;64:1217–1224.
58. Hermesen LAH, Smalbrugge M, van der Wouden JC, Leone SS, Dekker J, van der Horst HE. Trajectories of physical functioning and their prognostic indicators: A prospective cohort study in older adults with joint pain and comorbidity. *Maturitas* 2014;78: 316–322.
59. Hider SL, Whitehurst DGT, Thomas E, Foster NE. Pain location matters: the impact of leg pain on health care use, work disability and quality of life in patients with low back pain. *ESJ* 2015; 24:444–451.
60. Hiebert R, Campello MA, Weiser S, Ziemke GW, Fox BA, Nordin M. Predictors of short-term work-related disability among active duty US Navy personnel: a cohort study in patients with acute and subacute low back pain. *Spine J* 2012;12: 806–816.
61. Jellema P, van der Horst HE, Vlaeyen JWS, Stalman WAB, Bouter LM, van der Windt DAWM. Predictors of outcome in patients with (sub) acute low back pain differ across treatment groups. *Spine* 2006; 31:1699–1705.
62. Jensen JC, Haahr JP, Frost P, Andersen JH. Do work-related factors affect care-seeking in general practice for back pain or upper extremity pain? *Int Arch Occup Environ Health* 2013; 86:799–808.
63. Belo JN, Berger MY, Koes BW, Bierma-Zeinstra SMA. Prognostic factors in adults with knee pain in general practice. *Arthritis & Rheumatism* 2012; 61: 143–151.
64. Blagojevic M, Jinks C, Jordan KP. The influence of consulting primary care on knee pain in older people: a prospective cohort study. *Ann Rheum Dis* 2008;67:1702–1709.

65. Campbell P, Foster NE, Thomas E, Dunn KM. Prognostic indicators of low back pain in primary care: five-year prospective study. *J Pain* 2013;14: 873-883.
66. Chenot J-F, Becker A, Leonhardt C, Keller S, Donner-Banzhoff N, Baum E, Pflingsten M, Hildebrandt J, Kochen MM, Basler H-D. Determinants for receiving acupuncture for LBP and associated treatments: a prospective cohort study. *BMC Health Services Research* 2006, 6:149.
67. Dionne CE, Bourbonnais R, Pierre Fré'mont P, Rossignol M, Stock SR, Nouwen A Larocque I, Demers E. Determinants of 'return to work in good health' among workers with back pain who consult in primary care settings: a 2-year prospective study. *Eur Spine J* 2007; 16:641–655.
68. Dunn KM, Jordan KP, Croft PR. Contributions of prognostic factors for poor outcome in primary care low back pain patients. *EJP* 2011; 15: 313–319.
69. Feleus A, Bierma-Zeinstra SMA, Miedema HS, Verhagen AP, Nauta AP, A. Burdorf A, Verhaar JAN, Koes BW. Prognostic indicators for non-recovery of non-traumatic complaints at arm, neck and shoulder in general practice—6 months follow-up. *Rheumatology* 2007;46:169–176.
70. Foster NE, Thomas E, Bishop A, Dunn KM, Main CJ. Distinctiveness of psychological obstacles to recovery in low back pain patients in primary care. *Pain*. 2010; 148(3): 398–406.
71. Cecchi F, Molino-Lova R, Paperini A, Boni R, Castagnoli C, Gentile J, Pasquini G, Macchi C. Predictors of short- and long-term outcome in patients with chronic non-specific neck pain undergoing an exercise-based rehabilitation program: a prospective cohort study with 1-year follow-up. *Intern Emerg Med* 2011;6:413–421.
72. Eggermont LHP, Leveille SG, Shi L, Kiely DK, Shmerling RH, Jones RN, Guralnik JM, Bean JF. Pain characteristics associated with the onset of disability in older adults: the maintenance of balance, independent living, intellect, and zest in the elderly Boston study. *J Am Geriatr Soc* 2014; 62:1007–1016.
73. Elfering A, Käser A, Melloh M. Relationship between depressive symptoms and acute low back pain at first medical consultation, three and six weeks of primary care. *Psychology, Health & Medicine* 2014; 19:2, 235-246.
74. Nordeman L, Gunnarsson R, Mannerkorpi K. Prognostic Factors for Work Ability in Women With Chronic Low Back Pain Consulting Primary Health Care: A 2-Year Prospective Longitudinal Cohort Study. *Clinical J Pain* 2014;30: 391–398.
75. Laslett M, Steele M, Hing W, McNair P, Cadogan A. Shoulder pain in primary care – Part 2: Predictors of clinical outcome to 12 months. *J Rehabil Med* 2015; 47: 66–71.
76. Kongsted A, Vach W, Axø M, Bech RN, Hestbaek L. Expectation of recovery from low back pain: a longitudinal cohort study investigating patient characteristics related to expectations and the association between expectations and 3-month outcome. *Spine* 2013;39: 81 – 90.
77. Viniol A, Jegan N, Brugger M, Leonhardt C, Barth J, Baum E, Becker A, Strauch K. Even worse — risk factors and protective factors for transition from chronic localized low back pain to chronic widespread pain in general practice: a cohort study. *Spine* 2015;40: E890 - E899.
78. Hermsen LAH, Smalbrugge M, van der Wouden JC, Leone SS, Dekker J, van der Horst HE. Trajectories of physical functioning and their prognostic indicators: A prospective cohort study in older adults with joint pain and comorbidity. *Maturitas* 78 (2014) 316–322.
